# Supplementary material for: Electrostatic interaction assisted synthesis of a CdS/BCN heterostructure with enhanced photocatalytic effects
Source: Royal Society of Chemistry journal article supplement (doi:10.1039/c9tc05896f), 2019-12-17
Supplement: c9tc05896f1.pdf [file c9tc05896f1.pdf]

## Supplementary Information

# Electrostatic Interaction Assistant Synthesis of CdS/BCN Heterostructure with Enhanced Photocatalytic Effect

Yapeng Zheng,<sup>a</sup> Xinmei Hou,<sup>\*a</sup> Qun Li,<sup>a</sup> Zhi Fang,<sup>a</sup> Tao Yang,<sup>a</sup> Tongxiang Liang,<sup>b</sup> Xiangmei Duan,<sup>c</sup>

Minghui Shang<sup>\*d</sup> and Weiyu Yang<sup>d</sup>

<sup>a</sup> Collaborative Innovation Center of Steel Technology, University of Science and Technology  
Beijing, Beijing, 100083, P. R. China.

<sup>b</sup> School of Materials Science and Engineering, Jiangxi University of Science and Technology,  
Ganzhou, 341000, P.R. China.

<sup>c</sup> Faculty of Science, Ningbo University, Ningbo 315211, P. R. China.

<sup>d</sup> Institute of Materials, Ningbo University of Technology, Ningbo City, 315016, P.R. China.

\*Corresponding author.

E-mail: houxinmeiustb@ustb.edu.cn; Fax: +86 10 6233 2570; Tel: +86 10 6233 2570.

E-mail: shangminghui@nbut.edu.cn.

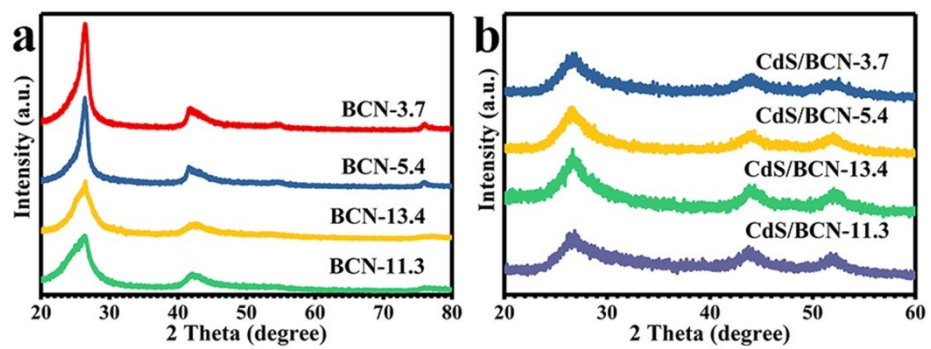

**Fig. S1** XRD patterns of BCN-X (a) and 0.5% CdS/BCN-X (b).

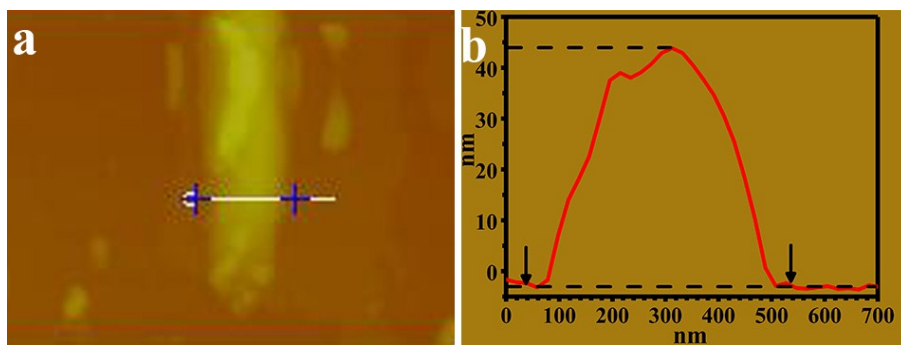

**Fig. S2** (a) AFM image of BCN-13.4 nanosheet. (b) The height profile of (a).

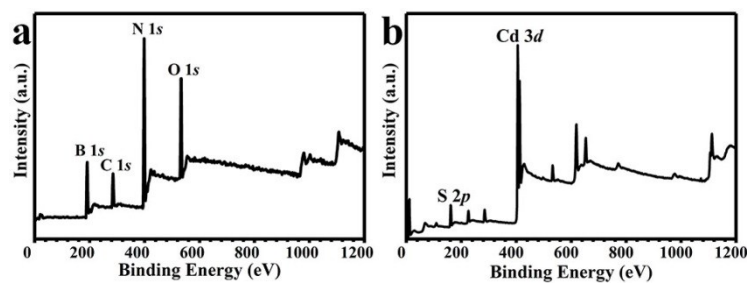

**Fig. S3** (a) XPS survey spectrum of BCN-13.4. (b) XPS survey spectrum of CdS.

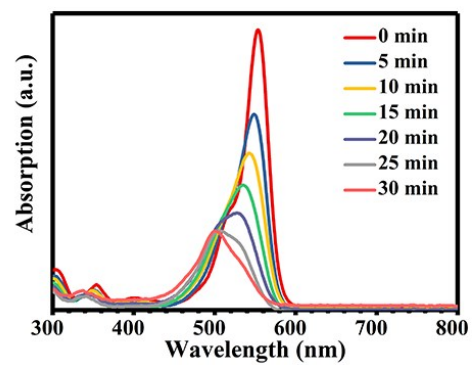

**Fig. S4** UV-vis absorption spectra the RhB solution (10 mg L<sup>-1</sup>, 40 mL) in the presence of 0.5% CdS/BCN-13.4 at different time intervals.

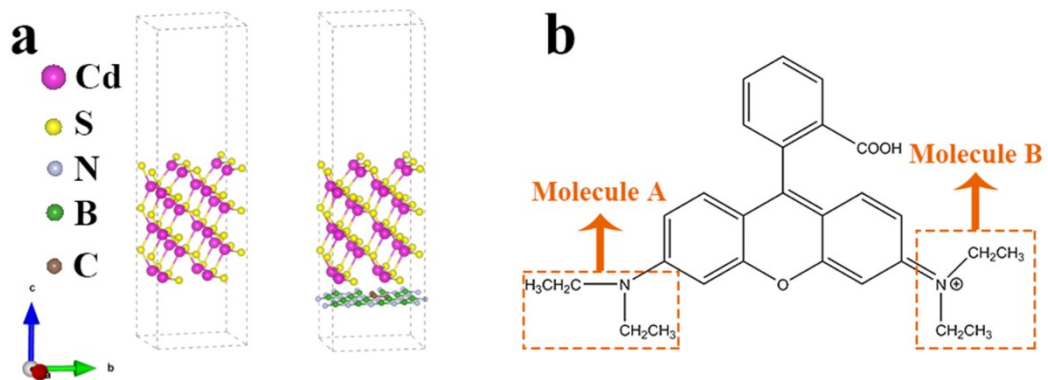

**Fig. S5** (a) Slab models of CdS and CdS/BCN. (b) Schematic diagram of RhB molecular structure.

---

**Table S1.** Elemental analysis results from XPS for BCN samples.

| Sample   | Boron (atom %) | Carbon (atom %) | Nitrogen (atom %) | Oxygen (atom %) |
|----------|----------------|-----------------|-------------------|-----------------|
| BCN-3.7  | 43.4           | 3.7             | 46.9              | 6               |
| BCN-5.4  | 42.1           | 5.4             | 45.1              | 7.4             |
| BCN-13.4 | 37.2           | 13.4            | 35.3              | 14.1            |
| BCN-11.3 | 38.7           | 11.3            | 40.1              | 9.9             |
